# Supplementary material for: Quantifying the binding strength of salicylaldoxime–uranyl complexes relative to competing salicylaldoxime–transition metal ion complexes in aqueous solution: a combined experimental and computational study
Source: Royal Society of Chemistry journal article supplement (doi:10.1039/c6dt00116e), 2016-01-01
Supplement: c6dt00116e1.pdf [file c6dt00116e1.pdf]

**Electronic Supplementary Information for**

**Quantifying the Binding Strength of Salicylaldoxime-Uranyl Complexes  
Relative to Competing Salicylaldoxime-Transition Metal Ion Complexes  
in Aqueous Solution: A Combined Experimental and Computational  
Study**

Nada Mehio<sup>1</sup>, Alexander S. Ivanov<sup>2</sup>, Neil J. Williams<sup>1,2</sup>, Richard T. Mayes<sup>2\*</sup>, Vyacheslav  
S. Bryantsev<sup>2\*</sup>, Robert D. Hancock<sup>3</sup>, and Sheng Dai<sup>1,2\*</sup>

<sup>1</sup>*Department of Chemistry, University of Tennessee, Knoxville TN 37996 USA*

<sup>2</sup>*Chemical Sciences Division, Oak Ridge National Laboratory, Oak Ridge TN 37831  
USA*

<sup>3</sup>*Department of Chemistry and Biochemistry, University of North Carolina Wilmington,  
Wilmington, NC 28403 USA*

**Email:** [dais@ornl.gov](mailto:dais@ornl.gov), [bryantsev@ornl.gov](mailto:bryantsev@ornl.gov); [mayerst@ornl.gov](mailto:mayerst@ornl.gov)

**Phone:** (865) 576-7307

**Fax:** (865) 241-5152

Submitted to *Dalton Transactions* on 01/10/2016

**Table S1.** Acid dissociation and formation constants of the ligands and complexes discussed in this manuscript. The ligands ( $L^{(i)}$ ) tabulated correspond to the ligands illustrated in **Figure 2**. The constants were obtained in aqueous solution at 25 °C and, unless otherwise noted, ionic strength  $I = 0.0$  M.

| <b>Equilibrium</b>                                                             | <b>log <math>\beta</math></b> | <b>References</b>             |
|--------------------------------------------------------------------------------|-------------------------------|-------------------------------|
| $H_2O \rightleftharpoons H^+ + OH^-$                                           | 14.00                         | 28                            |
| $UO_2^{2+} + OH^- \rightleftharpoons UO_2(OH)^+$                               | 8.75                          | 51                            |
| $UO_2^{2+} + 2 OH^- \rightleftharpoons UO_2(OH)_2$                             | 15.85                         | 51                            |
| $UO_2^{2+} + 3 OH^- \rightleftharpoons UO_2(OH)_3^-$                           | 21.8                          | 51                            |
| $UO_2^{2+} + 4 OH^- \rightleftharpoons UO_2(OH)_4^{2-}$                        | 23.6                          | 51                            |
| $2 UO_2^{2+} + OH^- \rightleftharpoons (UO_2)_2(OH)^{3+}$                      | 11.3                          | 51                            |
| $2 UO_2^{2+} + 2 OH^- \rightleftharpoons (UO_2)_2(OH)_2^{2+}$                  | 22.4                          | 51                            |
| $3 UO_2^{2+} + 5 OH^- \rightleftharpoons (UO_2)_3(OH)_5^+$                     | 54.4                          | 51                            |
| $UO_2^{2+} + CO_3^{2-} \rightleftharpoons (UO_2)(CO_3)$                        | 9.94                          | 53                            |
| $UO_2^{2+} + 2 CO_3^{2-} \rightleftharpoons (UO_2)(CO_3)_2^{2-}$               | 16.61                         | 53                            |
| $UO_2^{2+} + 3 CO_3^{2-} \rightleftharpoons (UO_2)(CO_3)_3^{4-}$               | 21.84                         | 53                            |
| $L^{(I)}H_2 \rightleftharpoons H^+ + L^{(I)}H^-$                               | 8.551, 8.07                   | 44 <sup>b</sup> and this work |
| $L^{(I)}H_2 \rightleftharpoons 2 H^+ + L^{(I)2-}$                              | 20.279, 19.35                 | 44 <sup>b</sup> and this work |
| $UO_2^{2+} + L^{(I)2-} \rightleftharpoons UO_2 L^{(I)}$                        | 16.1                          | This Work                     |
| $UO_2^{2+} + 2 L^{(I)2-} \rightleftharpoons UO_2 L_2^{(I)2-}$                  | 25.5                          | This Work                     |
| $Cu^{2+} + HL^{(I)-} \rightleftharpoons Cu(HL^{(I)})^+$                        | 10.12                         | 59                            |
| $Cu^{2+} + 2 HL^{(I)-} \rightleftharpoons Cu(HL^{(I)})_2$                      | 15.78                         | 59                            |
| $Fe^{3+} + HL^{(I)-} \rightleftharpoons Fe(HL^{(I)})^{2+}$                     | 9.38                          | 60                            |
| $Fe^{3+} + 2 HL^{(I)-} \rightleftharpoons Fe(HL^{(I)})_2^+$                    | 16.73                         | 60                            |
| $L^{(II)}H_2 \rightleftharpoons H^+ + L^{(II)}H^-$                             | 2.97                          | 28                            |
| $L^{(II)}H_2 \rightleftharpoons 2 H^+ + L^{(II)2-}$                            | 16.7                          | 28                            |
| $UO_2^{2+} + L^{(II)2-} \rightleftharpoons UO_2 L^{(II)}$                      | 13.1                          | 28                            |
| $UO_2^{2+} + 2 L^{(II)2-} \rightleftharpoons UO_2 L_2^{(II)2-}$                | 21.8                          | 28                            |
| $Cu^{2+} + L^{(II)2-} \rightleftharpoons CuL^{(II)}$                           | 10.60                         | 28                            |
| $Cu^{2+} + 2 L^{(II)2-} \rightleftharpoons CuL_2^{(II)2-}$                     | 18.45                         | 28                            |
| $Fe^{3+} + L^{(II)2-} \rightleftharpoons FeL^{(II)+}$                          | 11.90                         | 28                            |
| $Fe^{3+} + 2 L^{(II)2-} \rightleftharpoons FeL^{(II)2-}$                       | 28.25                         | 28                            |
| $L^{(III)}H \rightleftharpoons H^+ + L^{(III)-}$                               | 11.30                         | 28                            |
| $L^{(IV)}H \rightleftharpoons H^+ + L^{(IV)-}$                                 | 10.0                          | 28                            |
| $UO_2^{2+} + L^{(IV)-} \rightleftharpoons UO_2 L^{(IV)+}$                      | 5.9                           | 28                            |
| $L^{(V)}H \rightleftharpoons H^+ + L^{(V)-}$                                   | 4.20                          | 28                            |
| $UO_2^{2+} + L^{(V)-} \rightleftharpoons UO_2 L^{(V)+}$                        | 2.68                          | 28                            |
| $L^{(VI)}H \rightleftharpoons H^+ + L^{(VI)-}$                                 | 12.36                         | 48 <sup>a</sup>               |
| $UO_2^{2+} + L^{(VI)-} \rightleftharpoons UO_2 L^{(VI)+}$                      | 12.4                          | 29                            |
| $UO_2^{2+} + 2 L^{(VI)-} \rightleftharpoons UO_2 L_2^{(VI)}$                   | 22.3                          | 29                            |
| $L^{(VII)}H \rightleftharpoons H^+ + L^{(VII)-}$                               | 13.21                         | 48 <sup>a</sup>               |
| $UO_2^{2+} + L^{(VII)-} \rightleftharpoons UO_2 L^{(VII)+}$                    | 13.6                          | 29                            |
| $UO_2^{2+} + 2 L^{(VII)-} \rightleftharpoons UO_2 L_2^{(VII)}$                 | 23.7                          | 29                            |
| $L^{(VIII)}H_2 \rightleftharpoons H^+ + L^{(VIII)}H^-$                         | 12.06                         | 50 <sup>b</sup>               |
| $L^{(VIII)}H_2 \rightleftharpoons 2 H^+ + L^{(VIII)2-}$                        | 24.19                         | 50 <sup>b</sup>               |
| $UO_2^{2+} + L^{(VIII)2-} \rightleftharpoons UO_2 L^{(VIII)}$                  | 17.3                          | 50 <sup>b</sup>               |
| $UO_2^{2+} + 2 L^{(VIII)2-} \rightleftharpoons UO_2 L_2^{(VIII)2-}$            | 26.1                          | 50 <sup>b</sup>               |
| $L^{(IX)}H_2 \rightleftharpoons H^+ + L^{(IX)}H^-$                             | 10.70                         | 49 <sup>b</sup>               |
| $L^{(IX)}H_2 \rightleftharpoons 2 H^+ + L^{(IX)2-}$                            | 22.76                         | 49 <sup>b</sup>               |
| $UO_2^{2+} + L^{(IX)2-} \rightleftharpoons UO_2 L^{(IX)}$                      | 17.8                          | 49 <sup>b</sup>               |
| $UO_2 L^{(IX)} + 2 L^{(IX)2-} \rightleftharpoons UO_2 L_2^{(IX)2-}$            | 27.5                          | 49 <sup>b</sup>               |
| $Cu^{2+} + L^{(IX)2-} \rightleftharpoons CuL^{(IX)}$                           | 18.94                         | 15 <sup>b</sup>               |
| $Cu^{2+} + 2 L^{(IX)2-} \rightleftharpoons CuL_2^{(IX)2-}$                     | 24.45                         | 15 <sup>b</sup>               |
| $Fe^{3+} + HL^{(IX)-} \rightleftharpoons Fe(HL^{(IX)})^{2+}$                   | 25.66                         | 15 <sup>b</sup>               |
| $Fe^{3+} + HL^{(IX)-} + L^{(IX)2-} \rightleftharpoons Fe(L^{(IX)})(HL^{(IX)})$ | 43.94                         | 15 <sup>b</sup>               |

<sup>a</sup>Ionic strength 0.3 M NaClO<sub>4</sub>. <sup>b</sup>Ionic strength 0.5 M NaCl.

**Table S2.** Comparison of experimental, calculated, and predicted stability constant ( $\log \beta$ ) values for  $\text{UO}_2^{2+}$ -ligand complexes

| ligand                                   | <i>exp</i> $\log \beta^a$ | <i>calc</i> $\log \beta^b$ | <i>pred</i> $\log \beta^c$ | <i>abs. error</i> |
|------------------------------------------|---------------------------|----------------------------|----------------------------|-------------------|
| 1 acetate                                | 3.1                       | 9.9                        | 5.3                        | 2.2               |
| 2 acetylacetonate                        | 7.7                       | 15.6                       | 8.5                        | 0.8               |
| 3 phenolate                              | 6.4                       | 13.6                       | 7.4                        | 1.0               |
| 4 $\text{OH}^-$                          | 8.8                       | 18.4                       | 10.1                       | 1.3               |
| 5 $\text{NO}_3^-$                        | 0.0                       | 1.0                        | 0.2                        | 0.2               |
| 6 $\text{ClO}_3^-$                       | 0.5                       | -1.9                       | -1.4                       | 1.9               |
| 7 $\text{H}_2\text{PO}_4^-$              | 3.3                       | 6.3                        | 3.2                        | 0.1               |
| 8 acetamidoxime                          | 13.6                      | 24.3                       | 13.4                       | 0.2               |
| 9 benzamidoxime                          | 12.4                      | 22.1                       | 12.2                       | 0.2               |
| 10 2acetamidoxime                        | 23.7                      | 41.2                       | 23.1                       | 0.6               |
| 11 2benzamidoxime                        | 22.3                      | 37.7                       | 21.1                       | 1.2               |
| 12 glutarimidedioxime (HL <sup>-</sup> ) | 11.3                      | 23.4                       | 12.9                       | 1.6               |
| 13 oxalate                               | 7.3                       | 11.7                       | 6.3                        | 1.0               |
| 14 phthalate                             | 5.6                       | 9.4                        | 5.0                        | 0.6               |
| 15 salicylate                            | 13.0                      | 20.2                       | 11.1                       | 1.9               |
| 16 catecholate                           | 16.8                      | 24.7                       | 13.7                       | 3.1               |
| 17 glutarimidedioxime (L <sup>2-</sup> ) | 19.1                      | 35.2                       | 19.6                       | 0.5               |
| 18 $\text{CO}_3^{2-}$                    | 9.7                       | 17.5                       | 9.6                        | 0.1               |
| 19 $\text{SO}_4^{2-}$                    | 3.0                       | 5.2                        | 2.6                        | 0.4               |
| 20 $\text{HPO}_4^{2-}$                   | 7.2                       | 14.7                       | 8.0                        | 0.8               |
| 21 phthalimidedioxime                    | 16.8                      | 25.5                       | 14.1                       | 2.7               |

<sup>a</sup>Corrected to zero ionic strength with the Davies equation. <sup>b</sup>Calculated using the methodology described in ref 41. <sup>c</sup>Predicted from the correlation [ $\text{pred } \log \beta = 0.5692 \times \text{calc } \log \beta$ ] shown in **Figure 8**.

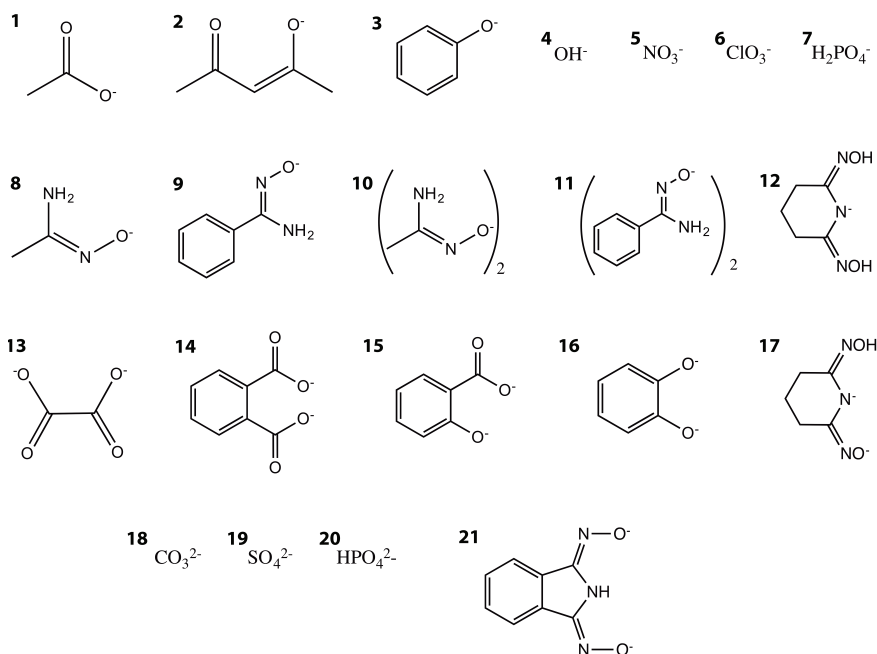

**Table S3.** Full chemical name of the CSD crystal structures depicted in Figures 1, S5, and S6 by CSD reference code.

| Figure | Ref. Code | Full Chemical Name                                                                                                   |
|--------|-----------|----------------------------------------------------------------------------------------------------------------------|
| 1      | ACOXNI10  | bis(2,2'-Imino-bis(Acetamidoxime)) copper(II) chloride                                                               |
| 1      | AICOCU10  | bis(4-Aminoimidazole-5-carboxamidoxime) copper(II) perchlorate                                                       |
| 1      | YOHFEI    | bis(Acetato-O)-bis(N'-hydroxypyridine-2-carboximidamide) cadmium(II) ethanol solvate                                 |
| 1      | CUHJUK    | Disodium bis(adenine-N <sup>1</sup> -oxide) copper(II) octahydrate                                                   |
| 1      | ORUTIF    | (N'-(oxy)-N-methylbenzenecarboximidamido)-(N-(oxy)-N'-methylbenzenecarboximidamide) oxo-technetium(IV)               |
| 1      | CIMMIW    | tris(N <sup>1</sup> , N <sup>2</sup> -dihydroxyethanediimidamide) nickel(II) ditetrafluoroborate                     |
| 1      | WOBHUS    | Aqua-(N <sup>1</sup> , N <sup>2</sup> -dihydroxyethanediimidamide)-oxolato copper(II)                                |
| 1      | TEKYUD    | bis(N-(2,6-Dimethylphenyl)aminoglyoximato-N,N') nickel(II)                                                           |
| 1      | RASBIW    | Oxo-(2-thienylamidoximato-N,O)-(2-thienylamidoximato-N',O)-acetylacetonato molybdenum(VI)                            |
| 1      | FOWJAC    | bis(Acetylacetonato-O,O')-(acetamidoximato-N,O)-nitrosyl molybdenum(VI)                                              |
| S6     | GIQBUE    | bis(Triethylammonium) bis(m2-2-oxybenzoato)-bis(nitrato-O,O')-tetraoxo-diu-<br>ranium(VI)                            |
| S6     | BIDVUF    | bis(2-Amino-2-methyl-1-propanol)-copper(II) bis(salicylato)-copper(II) 2-<br>propanol solvate                        |
| S6     | PIMSUB    | bis(Oxonium) chloride diaqua-bis(2-oxy-5-nitrobenzoato) iron(III)                                                    |
| S6     | TEVWAU    | dioxo-bis(2,6-bis(N-oxidoiminio)piperidinato) uranium(VI) monohydrate                                                |
| S6     | Ref. 15   | Glutarimidedioxime iron(III) dichloride                                                                              |
| S7     | BOCCOL    | tetrakis(( $\mu_3$ -Salicylidenealdoximato)-(salicylidenealdoxime) iron(III))<br>salicylidenealdoxime xylene solvate |
| S7     | CSALCU    | bis(5-Chlorosalicylaldoximato) copper(II)                                                                            |

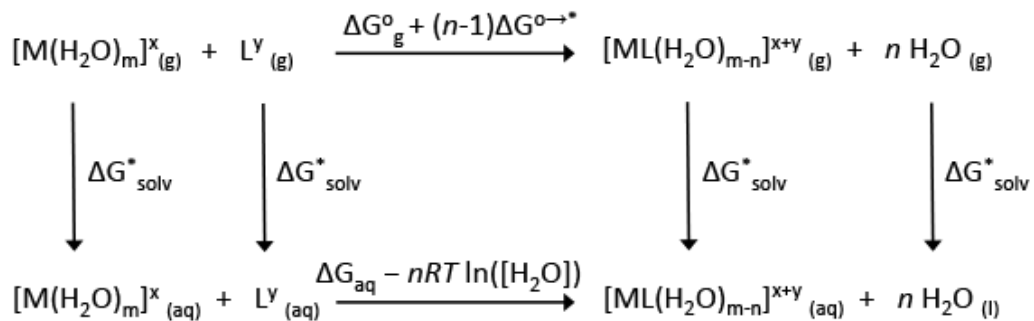

**Figure S1.** Thermodynamic cycle used to calculate  $\Delta G_{aq}$ .

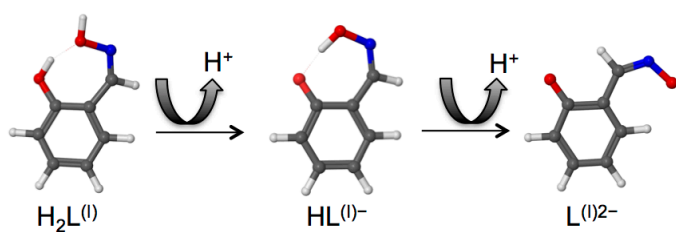

**Figure S2.** Stepwise dissociation of salicylaldoxime used to fit UV/Vis titration data. Color legend: O, red; N, blue; C, grey; H, white.

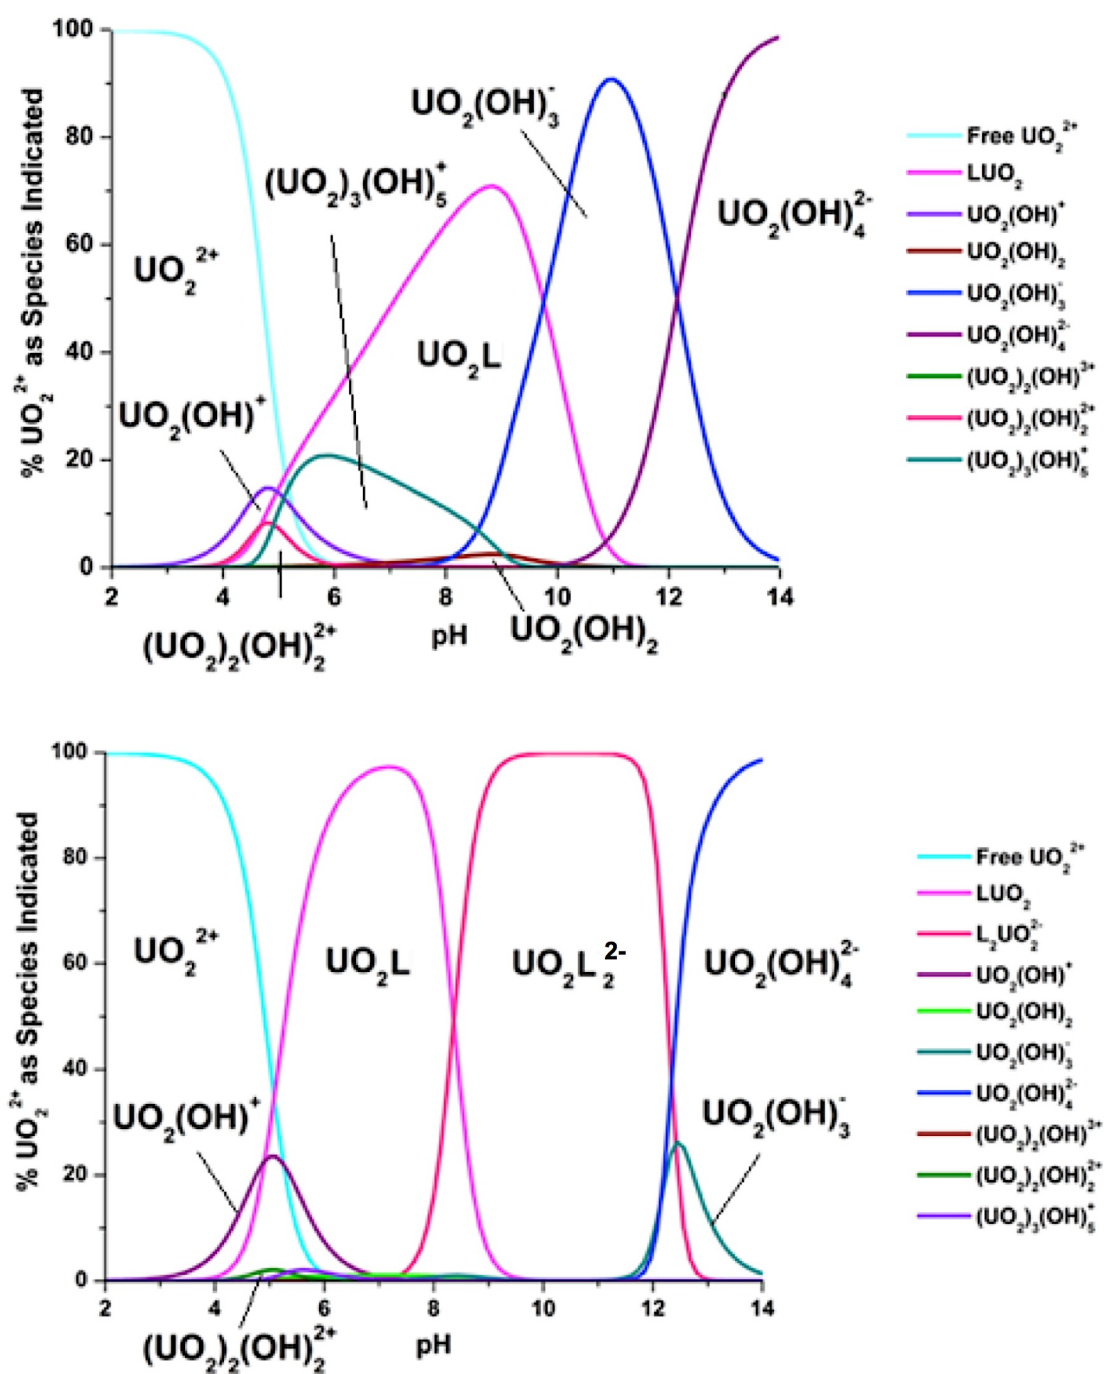

**Figure S3.** Species distribution diagrams of the 1:1 (*left*) and the 10:1 salicyldoxime (L) to uranyl titration solutions as a function of pH. Distribution diagrams were generated with the HYSS<sup>52</sup> software using the uranyl hydrolysis constants in ref. 51 and the uranyl-salicyldoxime formation constants from this work.

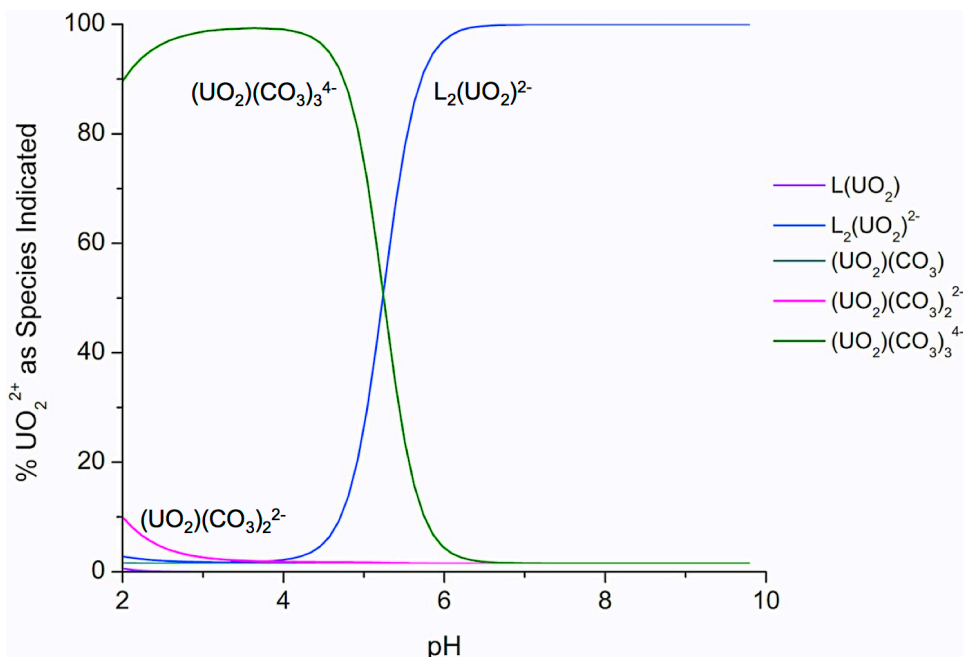

**Figure S4.** Species distribution diagrams of 0.001 M salicyldoxime,  $1.3 \times 10^{-8}$  M uranyl, and 0.0025 M carbonate calculated using the HYSS<sup>52</sup> software. The uranyl carbonate constants were taken from ref. 53 and the uranyl-salicyldoxime formation constants from this work.

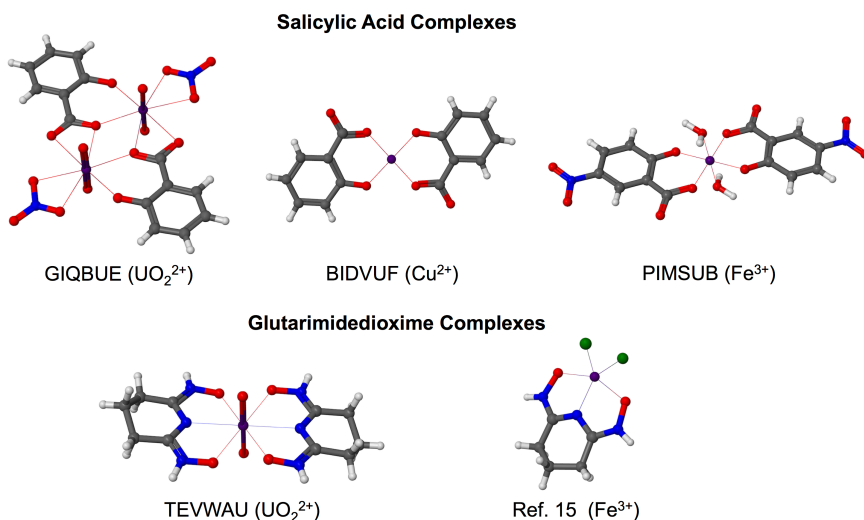

**Figure S5.** Crystal structures of salicylic acid and glutarimidedioxime complexes. GIQBUE<sup>59</sup> ( $\text{C}_{30}\text{H}_{32}\text{Cu}_2\text{N}_4\text{O}_{10} \cdot 2(\text{H}_3\text{BO}_3 \cdot 4(\text{H}_2\text{O}))$ ): phenolate- $\text{UO}_2^{2+}$  bond = 2.23(1) Å and carboxylate- $\text{UO}_2^{2+}$  bond = 2.42(1) Å. BIDVUF<sup>60</sup> ( $\text{C}_{14}\text{H}_8\text{CuO}_6 \cdot \text{C}_8\text{H}_{22}\text{CuN}_2\text{O}_2^{2+} \cdot 4(\text{C}_3\text{H}_8\text{O})$ ): phenolate- $\text{Cu}^{2+}$  bond = 1.900 Å and carboxylate- $\text{Cu}^{2+}$  bond = 1.903 Å. PIMSUB<sup>61</sup> ( $\text{C}_{14}\text{H}_{10}\text{FeN}_2\text{O}_{12} \cdot 2(\text{H}_3\text{O}^+) \cdot \text{Cl}^-$ ): phenolate- $\text{Fe}^{3+}$  bond = 1.973 Å and carboxylate- $\text{Fe}^{3+}$  bond = 1.944 Å. TEVWAU<sup>49</sup> ( $\text{C}_{10}\text{H}_{16}\text{N}_6\text{O}_6\text{U} \cdot \text{H}_2\text{O}$ ): oximate- $\text{UO}_2^{2+}$  bond 1 = 2.430 Å, oximate- $\text{UO}_2^{2+}$  bond 2 = 2.535 Å, and piperidine- $\text{UO}_2^{2+}$  bond = 2.563 Å. Ref. 15 ( $\text{C}_{10}\text{H}_{16}\text{N}_6\text{O}_6\text{FeCl}_2^+$ ): oximate- $\text{UO}_2^{2+}$  bond 1 = 2.019(7) Å, oximate- $\text{UO}_2^{2+}$  bond 1 = 2.027(7) Å, and piperidine- $\text{UO}_2^{2+}$  bond = 2.009(8) Å. Color legend: O, red; N, blue; C, grey; H, white; S, yellow; metal ion, purple.

### Salicylaldoxime Complexes

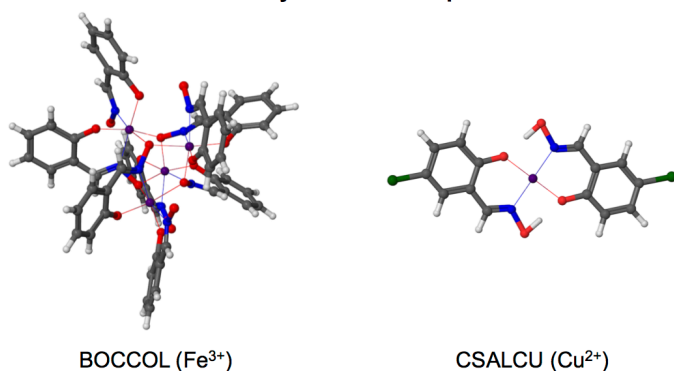

**Figure S6.** Crystal structures of salicylaldoxime-Fe<sup>3+</sup> and -Cu<sup>2+</sup> complexes. BOCCOL<sup>65</sup> (C<sub>56</sub>H<sub>44</sub>Fe<sub>4</sub>N<sub>8</sub>O<sub>16</sub>•C<sub>7</sub>H<sub>7</sub>NO<sub>2</sub>•C<sub>8</sub>H<sub>10</sub>•C<sub>8</sub>H<sub>10</sub>): phenolate-Fe<sup>3+</sup> bond = 1.889(8) Å and oximate-Fe<sup>3+</sup> bond = 2.14(1) Å. CSALCU<sup>64</sup> (C<sub>14</sub>H<sub>10</sub>Cl<sub>2</sub>CuN<sub>2</sub>O<sub>4</sub>): phenolate-Cu<sup>2+</sup> bond = 1.9082 Å and oximate-Cu<sup>2+</sup> bond = 1.9579 Å. Color legend: O, red; N, blue; C, grey; H, white; S, yellow; metal ion, purple.

### Optimized geometries of salicylaldoxime ligands, UO<sub>2</sub><sup>2+</sup>, and Cu<sup>2+</sup> complexes discussed in the main text and their total energies at the M06/SSC/6-311++G\*\* level of theory

#### Salicylaldoxime:

1) H<sub>2</sub>L<sup>(l)</sup>; total energy: - 475.9163087 Hartrees

symmetry c1

|   |              |              |              |
|---|--------------|--------------|--------------|
| N | 2.457273000  | -1.030157000 | 0.023359000  |
| C | 1.246482000  | -1.286549000 | -0.286277000 |
| C | -2.594349000 | 0.507900000  | 0.118076000  |
| C | -2.420764000 | -0.872432000 | 0.183089000  |
| C | -1.150571000 | -1.389886000 | 0.047146000  |
| C | -0.022129000 | -0.572103000 | -0.122601000 |
| C | -0.217849000 | 0.820702000  | -0.197748000 |
| C | -1.509067000 | 1.337221000  | -0.074011000 |
| H | -3.586918000 | 0.938229000  | 0.210625000  |
| H | -3.269822000 | -1.531693000 | 0.326187000  |
| H | -1.001650000 | -2.466701000 | 0.077200000  |
| O | 0.752779000  | 1.709894000  | -0.453666000 |
| H | -1.622779000 | 2.414158000  | -0.143087000 |
| O | 2.606182000  | 0.207013000  | 0.664980000  |
| H | 1.162998000  | -2.279580000 | -0.730274000 |
| H | 3.549636000  | 0.252571000  | 0.848890000  |
| H | 1.613867000  | 1.351606000  | -0.174843000 |

2) HL<sup>(l)</sup>; total energy: -475.376987 Hartrees



symmetry c1

|   |              |              |              |
|---|--------------|--------------|--------------|
| N | 2.464990000  | -0.948622000 | 0.070220000  |
| C | 1.238101000  | -1.255691000 | -0.158932000 |
| C | -2.645004000 | 0.495463000  | 0.073156000  |
| C | -2.469543000 | -0.892308000 | 0.104222000  |
| C | -1.178271000 | -1.383386000 | 0.016686000  |
| C | -0.050342000 | -0.560425000 | -0.082050000 |
| C | -0.219194000 | 0.869909000  | -0.156224000 |
| C | -1.565277000 | 1.340329000  | -0.046852000 |
| H | -3.648537000 | 0.915267000  | 0.137965000  |
| H | -3.318565000 | -1.564566000 | 0.189052000  |
| H | -1.016838000 | -2.462218000 | 0.032265000  |
| O | 0.744772000  | 1.679510000  | -0.332066000 |
| H | -1.698748000 | 2.419161000  | -0.089150000 |
| O | 2.764083000  | 0.319869000  | 0.485292000  |
| H | 1.149906000  | -2.312491000 | -0.432036000 |
| H | 2.022018000  | 0.943274000  | 0.197891000  |

3)  $L^{(1)2-}$ ; total energy: -474.658113 Hartrees

symmetry c1

|   |              |              |              |
|---|--------------|--------------|--------------|
| N | 1.622994000  | -2.512728000 | -0.155315000 |
| C | 1.203245000  | -1.263496000 | -0.161247000 |
| C | -2.682090000 | 0.535910000  | 0.057551000  |
| C | -2.573980000 | -0.851588000 | 0.078304000  |
| C | -1.298495000 | -1.429761000 | 0.005822000  |
| C | -0.125178000 | -0.674239000 | -0.087036000 |
| C | -0.213452000 | 0.792587000  | -0.112849000 |
| C | -1.542199000 | 1.326410000  | -0.034267000 |
| H | -3.666768000 | 1.011513000  | 0.113376000  |
| H | -3.461656000 | -1.481496000 | 0.150637000  |
| H | -1.162631000 | -2.507947000 | 0.020552000  |
| O | 0.798465000  | 1.552335000  | -0.197643000 |
| H | -1.619989000 | 2.415834000  | -0.052217000 |
| O | 0.761835000  | -3.494371000 | -0.070777000 |
| H | 2.012689000  | -0.537448000 | -0.234415000 |

### Uranyl complexes with salicylaldoxime:

1)  $[UO_2(HL^{(1)})(H_2O)_3]^+$ ; total energy: -1331.951756 Hartrees

symmetry c1

|   |              |              |             |
|---|--------------|--------------|-------------|
| N | 1.620771000  | 1.495598000  | 1.914273000 |
| C | 0.398930000  | 1.205690000  | 1.611566000 |
| C | -1.110834000 | -2.570435000 | 0.547856000 |
| C | -1.924970000 | -1.438528000 | 0.464480000 |
| C | -1.399042000 | -0.213799000 | 0.801037000 |
| C | -0.056005000 | -0.084763000 | 1.198792000 |

|   |              |              |              |
|---|--------------|--------------|--------------|
| C | 0.768383000  | -1.239713000 | 1.271542000  |
| C | 0.206265000  | -2.478752000 | 0.952691000  |
| H | -1.519852000 | -3.543690000 | 0.294532000  |
| H | -2.958565000 | -1.527251000 | 0.151622000  |
| H | -2.020056000 | 0.677526000  | 0.763106000  |
| O | 2.021806000  | -1.148893000 | 1.658024000  |
| H | 0.830669000  | -3.362957000 | 1.025457000  |
| O | 1.763847000  | 2.841490000  | 2.339092000  |
| U | 3.735671000  | 0.204816000  | 1.409351000  |
| O | 4.142083000  | 0.451781000  | 3.091157000  |
| O | 3.515355000  | 0.107103000  | -0.318795000 |
| O | 4.089110000  | 2.677959000  | 0.993729000  |
| H | 3.371993000  | 3.169314000  | 1.440093000  |
| H | 4.194959000  | 3.052327000  | 0.113961000  |
| O | 4.700672000  | -2.155052000 | 1.554024000  |
| H | 4.015820000  | -2.828691000 | 1.635535000  |
| H | 5.482308000  | -2.475505000 | 2.013669000  |
| H | -0.342171000 | 2.004006000  | 1.704791000  |
| H | 1.875786000  | 2.794633000  | 3.299725000  |
| O | 6.245778000  | 0.409819000  | 0.947830000  |
| H | 6.680021000  | 0.278296000  | 0.098556000  |
| H | 6.882899000  | 0.823674000  | 1.539662000  |

2) [UO<sub>2</sub>(HL<sup>(l)</sup>)<sub>2</sub>(H<sub>2</sub>O)]; total energy: -1654.6585449 Hartrees  
symmetry c1

|   |              |              |              |
|---|--------------|--------------|--------------|
| N | -1.149985000 | 1.238379000  | 0.668627000  |
| C | -2.334548000 | 1.714920000  | 0.545601000  |
| H | -2.466642000 | 2.768579000  | 0.808107000  |
| C | -5.859978000 | -0.221589000 | -0.757961000 |
| C | -5.877839000 | 1.130234000  | -0.416689000 |
| C | -4.705918000 | 1.724127000  | 0.004935000  |
| C | -3.507487000 | 1.004196000  | 0.096161000  |
| C | -3.495660000 | -0.371890000 | -0.247708000 |
| C | -4.695482000 | -0.958908000 | -0.675514000 |
| H | -6.773179000 | -0.705002000 | -1.093892000 |
| H | -6.794905000 | 1.705211000  | -0.481468000 |
| H | -4.697497000 | 2.777735000  | 0.275456000  |
| O | -2.401183000 | -1.076829000 | -0.165699000 |
| H | -4.676259000 | -2.011211000 | -0.941438000 |
| O | -0.254557000 | 2.176931000  | 1.136003000  |
| U | -0.217138000 | -1.135117000 | 0.253976000  |
| O | -0.497203000 | -1.558171000 | 1.937894000  |
| O | 0.180649000  | -0.812511000 | -1.419824000 |
| O | 1.611825000  | 0.229001000  | 0.752901000  |
| N | 1.973456000  | -2.484599000 | 0.602892000  |
| O | 1.875116000  | -3.852016000 | 0.968716000  |

|   |              |              |              |
|---|--------------|--------------|--------------|
| C | 3.173676000  | -2.156769000 | 0.281363000  |
| C | 3.588499000  | -0.828349000 | -0.067667000 |
| C | 2.792424000  | 0.320880000  | 0.210618000  |
| C | 3.348934000  | 1.579552000  | -0.085178000 |
| C | 4.603112000  | 1.695635000  | -0.641466000 |
| C | 5.384665000  | 0.567487000  | -0.911872000 |
| C | 4.876342000  | -0.673129000 | -0.610153000 |
| H | 3.934599000  | -2.942585000 | 0.298251000  |
| H | 5.470106000  | -1.565553000 | -0.795495000 |
| H | 6.374258000  | 0.671376000  | -1.342117000 |
| H | 4.991673000  | 2.684341000  | -0.869127000 |
| H | 2.749634000  | 2.460487000  | 0.126639000  |
| H | 0.596974000  | 1.692400000  | 1.135841000  |
| H | 1.488634000  | -3.814272000 | 1.854991000  |
| O | -0.501032000 | -3.606141000 | -0.416615000 |
| H | -1.335878000 | -4.073646000 | -0.340278000 |
| H | 0.213532000  | -4.166145000 | -0.072927000 |

3)  $[\text{UO}_2(\text{L}^{(1)})(\text{H}_2\text{O})_2]$ ; total energy: -1255.1180818 Hartrees  
symmetry c1

|   |              |              |              |
|---|--------------|--------------|--------------|
| N | 1.418780000  | 1.472192000  | 0.833286000  |
| C | 0.198387000  | 1.387873000  | 0.462221000  |
| H | -0.455528000 | 2.262199000  | 0.498521000  |
| C | -1.353103000 | -2.297229000 | -0.934728000 |
| C | -2.169511000 | -1.170077000 | -0.875476000 |
| C | -1.631999000 | 0.015328000  | -0.413942000 |
| C | -0.297377000 | 0.111719000  | -0.007974000 |
| C | 0.541085000  | -1.041055000 | -0.068256000 |
| C | -0.030358000 | -2.233106000 | -0.540310000 |
| H | -1.756513000 | -3.239741000 | -1.294653000 |
| H | -3.207756000 | -1.221112000 | -1.185086000 |
| H | -2.251608000 | 0.908265000  | -0.359302000 |
| O | 1.802747000  | -1.026433000 | 0.293746000  |
| H | 0.609186000  | -3.109821000 | -0.585268000 |
| O | 2.129057000  | 2.464426000  | 1.286400000  |
| U | 3.369900000  | 0.386249000  | 1.102404000  |
| O | 3.053655000  | -0.041416000 | 2.785887000  |
| O | 3.983463000  | 0.798953000  | -0.501098000 |
| O | 4.722505000  | -1.812573000 | 0.942540000  |
| O | 4.919492000  | 2.260433000  | 1.997405000  |
| H | 4.732408000  | -2.170098000 | 0.048520000  |
| H | 4.357762000  | -2.501357000 | 1.507951000  |
| H | 4.927724000  | 2.945786000  | 1.319582000  |
| H | 4.446802000  | 2.648697000  | 2.742830000  |

4)  $[\text{UO}_2(\text{L}^{(1)})_2]^{2-}$ ; total energy: -1577.0735695 Hartrees

symmetry c1

|   |              |              |              |
|---|--------------|--------------|--------------|
| N | 0.921845000  | 1.089174000  | 0.748487000  |
| C | -0.165602000 | 1.193887000  | 0.075684000  |
| H | -0.630633000 | 2.179567000  | -0.058286000 |
| C | -2.072829000 | -2.174767000 | -1.684633000 |
| C | -2.623279000 | -0.901199000 | -1.830513000 |
| C | -1.961649000 | 0.166994000  | -1.236211000 |
| C | -0.781532000 | 0.017881000  | -0.508050000 |
| C | -0.196488000 | -1.295744000 | -0.348818000 |
| C | -0.903964000 | -2.362012000 | -0.970246000 |
| H | -2.566363000 | -3.034986000 | -2.137565000 |
| H | -3.541832000 | -0.745414000 | -2.391346000 |
| H | -2.370512000 | 1.174540000  | -1.333878000 |
| O | 0.880241000  | -1.530032000 | 0.297281000  |
| H | -0.470601000 | -3.352953000 | -0.854069000 |
| O | 1.595177000  | 2.024576000  | 1.327738000  |
| U | 2.605789000  | -0.343148000 | 1.572982000  |
| O | 1.674088000  | -0.589665000 | 3.061122000  |
| O | 3.537493000  | -0.096644000 | 0.084837000  |
| O | 4.331331000  | 0.843759000  | 2.848649000  |
| N | 4.289715000  | -1.775457000 | 2.397556000  |
| O | 3.616402000  | -2.710862000 | 1.818285000  |
| C | 5.377108000  | -1.880170000 | 3.070445000  |
| C | 5.993005000  | -0.704152000 | 3.654190000  |
| C | 5.407984000  | 0.609474000  | 3.494873000  |
| C | 6.115434000  | 1.675757000  | 4.116306000  |
| C | 7.284236000  | 1.488522000  | 4.830799000  |
| C | 7.834656000  | 0.214952000  | 4.976774000  |
| C | 7.173059000  | -0.853253000 | 4.382455000  |
| H | 5.842119000  | -2.865851000 | 3.204481000  |
| H | 7.581901000  | -1.860801000 | 4.480193000  |
| H | 8.753157000  | 0.059175000  | 5.537692000  |
| H | 7.777745000  | 2.348753000  | 5.283735000  |
| H | 5.682100000  | 2.666701000  | 4.000051000  |

Copper complexes with salicylaldoxime:

1) [Cu(HL<sup>(l)</sup>)(H<sub>2</sub>O)<sub>2</sub>]<sup>+</sup>; total energy: -825.3637068 Hartrees

symmetry c1

|   |              |              |              |
|---|--------------|--------------|--------------|
| N | 1.880590000  | 1.162398000  | 0.904042000  |
| C | 0.595168000  | 1.032131000  | 0.740641000  |
| H | -0.024435000 | 1.857073000  | 1.098865000  |
| C | -1.407019000 | -2.092587000 | -1.199477000 |
| C | -2.115025000 | -0.965400000 | -0.751902000 |
| C | -1.434135000 | 0.029272000  | -0.107746000 |
| C | -0.038379000 | -0.063077000 | 0.115029000  |

|    |              |              |              |
|----|--------------|--------------|--------------|
| C  | 0.670525000  | -1.223598000 | -0.320828000 |
| C  | -0.053239000 | -2.219660000 | -0.999404000 |
| H  | -1.939274000 | -2.886097000 | -1.715324000 |
| H  | -3.182217000 | -0.886092000 | -0.920674000 |
| H  | -1.955997000 | 0.917284000  | 0.238757000  |
| O  | 1.942715000  | -1.418325000 | -0.106210000 |
| H  | 0.488004000  | -3.095914000 | -1.338804000 |
| O  | 2.264199000  | 2.294539000  | 1.638183000  |
| Cu | 3.140939000  | -0.265296000 | 0.736189000  |
| O  | 4.513070000  | -1.707036000 | 0.368959000  |
| H  | 5.377328000  | -1.577982000 | -0.035527000 |
| H  | 4.057124000  | -2.414428000 | -0.107803000 |
| O  | 4.444879000  | 0.700484000  | 1.930760000  |
| H  | 3.995233000  | 1.464498000  | 2.329547000  |
| H  | 4.978203000  | 0.259150000  | 2.600304000  |
| H  | 2.496741000  | 2.969365000  | 0.983666000  |

2) [Cu(HL<sup>(l)</sup>)<sub>2</sub>]; total energy: -1148.103999 Hartrees

symmetry c2h

|    |              |              |             |
|----|--------------|--------------|-------------|
| N  | 0.819874000  | 1.773927000  | 0.000000000 |
| C  | 2.074882000  | 2.045812000  | 0.000000000 |
| H  | 2.346880000  | 3.103966000  | 0.000000000 |
| C  | 5.306615000  | -0.664251000 | 0.000000000 |
| C  | 5.535332000  | 0.714568000  | 0.000000000 |
| C  | 4.451775000  | 1.561168000  | 0.000000000 |
| C  | 3.131887000  | 1.075882000  | 0.000000000 |
| C  | 2.900928000  | -0.326043000 | 0.000000000 |
| C  | 4.026435000  | -1.171130000 | 0.000000000 |
| H  | 6.149213000  | -1.350080000 | 0.000000000 |
| H  | 6.545352000  | 1.108635000  | 0.000000000 |
| H  | 4.602363000  | 2.638464000  | 0.000000000 |
| O  | 1.709229000  | -0.862301000 | 0.000000000 |
| H  | 3.849064000  | -2.242279000 | 0.000000000 |
| O  | -0.004559000 | 2.864272000  | 0.000000000 |
| Cu | 0.000000000  | 0.000000000  | 0.000000000 |
| O  | -1.709229000 | 0.862301000  | 0.000000000 |
| N  | -0.819874000 | -1.773927000 | 0.000000000 |
| O  | 0.004559000  | -2.864272000 | 0.000000000 |
| C  | -2.074882000 | -2.045812000 | 0.000000000 |
| C  | -3.131887000 | -1.075882000 | 0.000000000 |
| C  | -2.900928000 | 0.326043000  | 0.000000000 |
| C  | -4.026435000 | 1.171130000  | 0.000000000 |
| C  | -5.306615000 | 0.664251000  | 0.000000000 |
| C  | -5.535332000 | -0.714568000 | 0.000000000 |
| C  | -4.451775000 | -1.561168000 | 0.000000000 |
| H  | -2.346880000 | -3.103966000 | 0.000000000 |

|   |              |              |             |
|---|--------------|--------------|-------------|
| H | -4.602363000 | -2.638464000 | 0.000000000 |
| H | -6.545352000 | -1.108635000 | 0.000000000 |
| H | -6.149213000 | 1.350080000  | 0.000000000 |
| H | -3.849064000 | 2.242279000  | 0.000000000 |
| H | -0.897451000 | 2.455605000  | 0.000000000 |
| H | 0.897451000  | -2.455605000 | 0.000000000 |
